# Supplementary material for: MITOGEN-ACTIVATED PROTEIN KINASE 4 impacts leaf development, temperature, and stomatal movement in hybrid aspen
Source: PubMed Central journal article supplement — Plant Physiol. 2021 May 19;186(4):2190–204. doi: 10.1093/plphys/kiab186 (PMC8331162; doi:10.1093/plphys/kiab186), 2021-05-19
Supplement: kiab186_supplementary_data.pdf [file kiab186_supplementary_data.pdf]

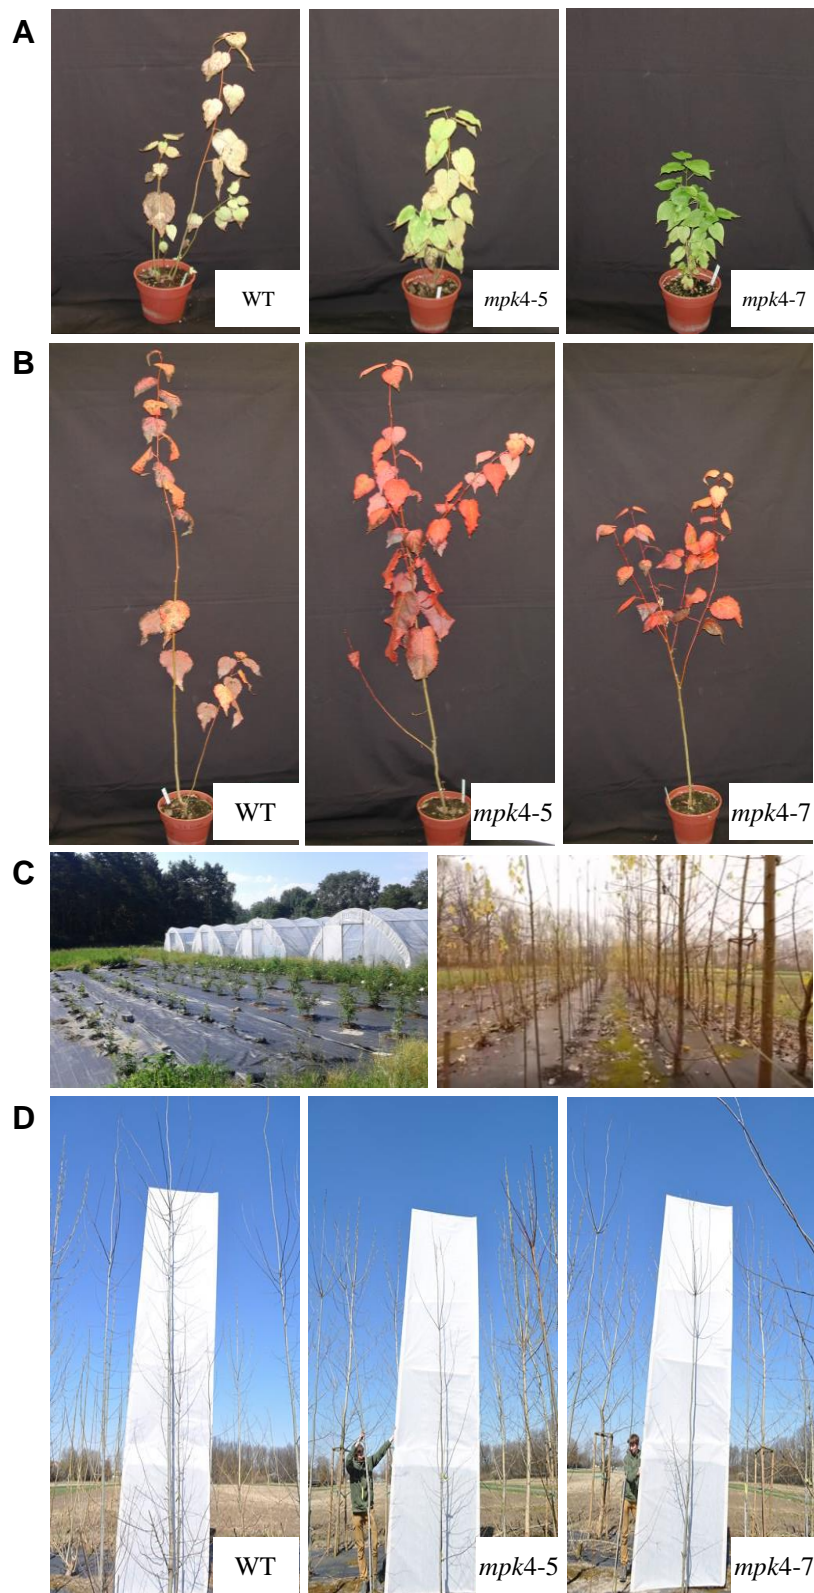

**Supplemental Figure S1. WT and *mpk4* phenotype.** (A) Six-month-old plants; and (B) one-year-old plants in greenhouse conditions; (C) first and second season; and (D) third season of tree growth in field conditions.

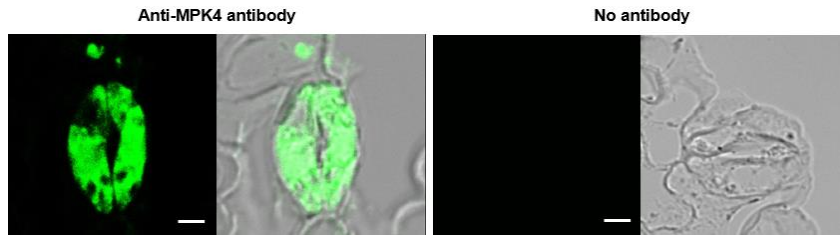

**Supplemental Figure S2. MPK4 localization in the cytoplasm of guard cells.** A control was prepared without primary antibody. Scale bars: 10  $\mu\text{m}$ . Presented pictures are representative for 10 independent analysis.

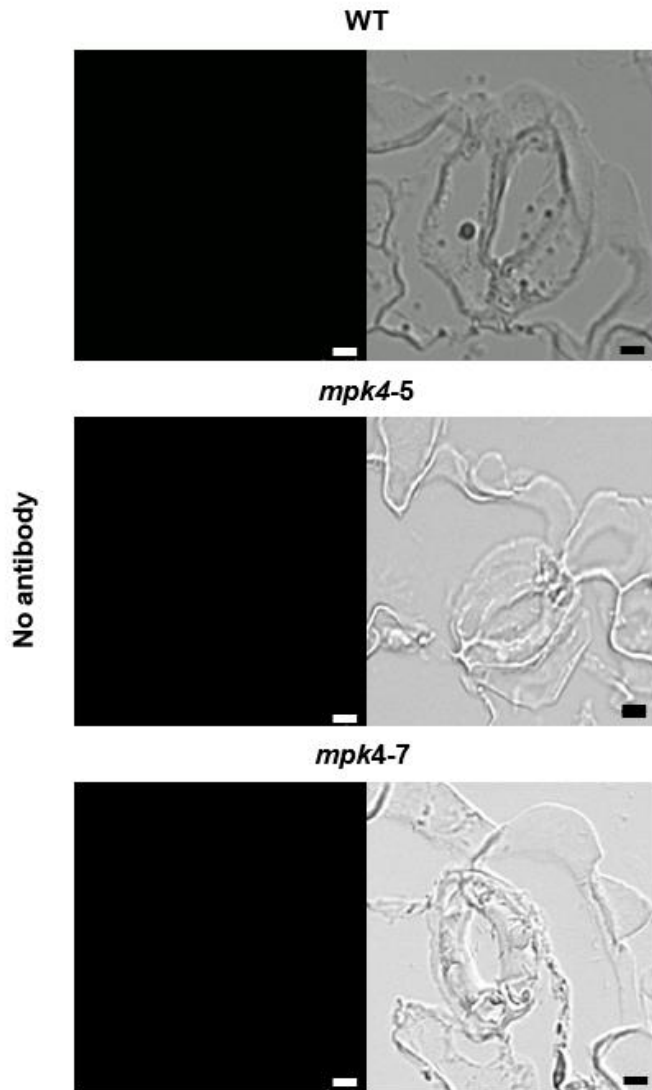

**Supplemental Figure S3. No antibody control for Fig. 2.** A control was prepared without primary antibody. Scale bars: 5 μm. Presented pictures are representative for 10 analysis.

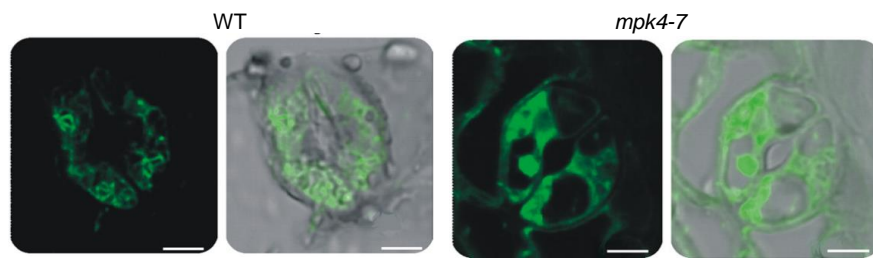

**Supplemental Figure S4. Anti-tubulin antibody for microtubule distribution in wild type (WT) and transgenic *mpk4-7* guard cell wall.** Scale bars: 5  $\mu$ m. Presented pictures are representative for 10 analysis.

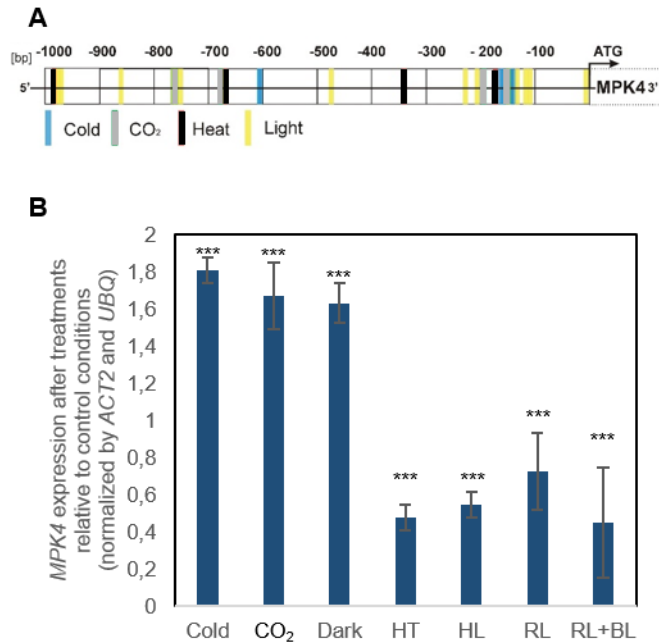

**Supplemental Figure S5. *MPK4* expression under environmental control.** (A) The distribution of cis-regulatory elements (CREs, specific non-coding DNA motifs) in the 1 kb of 5' promoter region of *MPK4* from *P. trichocarpa*. The CREs are located in the promoter region upstream of a coding sequence, positions are with respect to the first base of the translation start site (ATG). The presence of various motifs responsible for the regulation of gene expression under different environmental stimuli was predicted and their positions are marked on the figure. Analysis of *MPK4* promoter sequence allowed to identify CREs composed of 5–20 nucleotides that were localized in the proximal promoter i.e. several hundred nucleotides upstream of a transcription start site (TSS) of *MPK4* gene. The distribution of CREs was random, however, CREs frequency was highly enriched at 100-250 bp upstream of the TSS (high and low temperature, CO<sub>2</sub>, and light). (B) *MPK4* expression pattern in response to different environmental stimuli in WT plants after 2 h-treatment of leaves with different environmental factors: cold (4 °C), high CO<sub>2</sub> (CO<sub>2</sub>; 2000 ppm), dark, high temperature (HT, 42 °C), red-orange light (RL, 617 nm, Light 2), and red-orange supplemented with blue royal light (RL+BL, 447 nm, Light 3). Moreover, *MPK4* transcript abundance was also measured in leaves exposed by 1 h to high light intensity (HL, 2000 μmol of photons m<sup>-2</sup> s<sup>-1</sup>, Light 1). 21 °C, and ambient CO<sub>2</sub> were used as control conditions. Expression level is presented relatively to WT control plants, referred to 1. Bars represent means ± SD (n = 6). The asterisks indicate significant differences from the WT revealed by the Tukey HSD test (\*\*\*) P < 0.001.

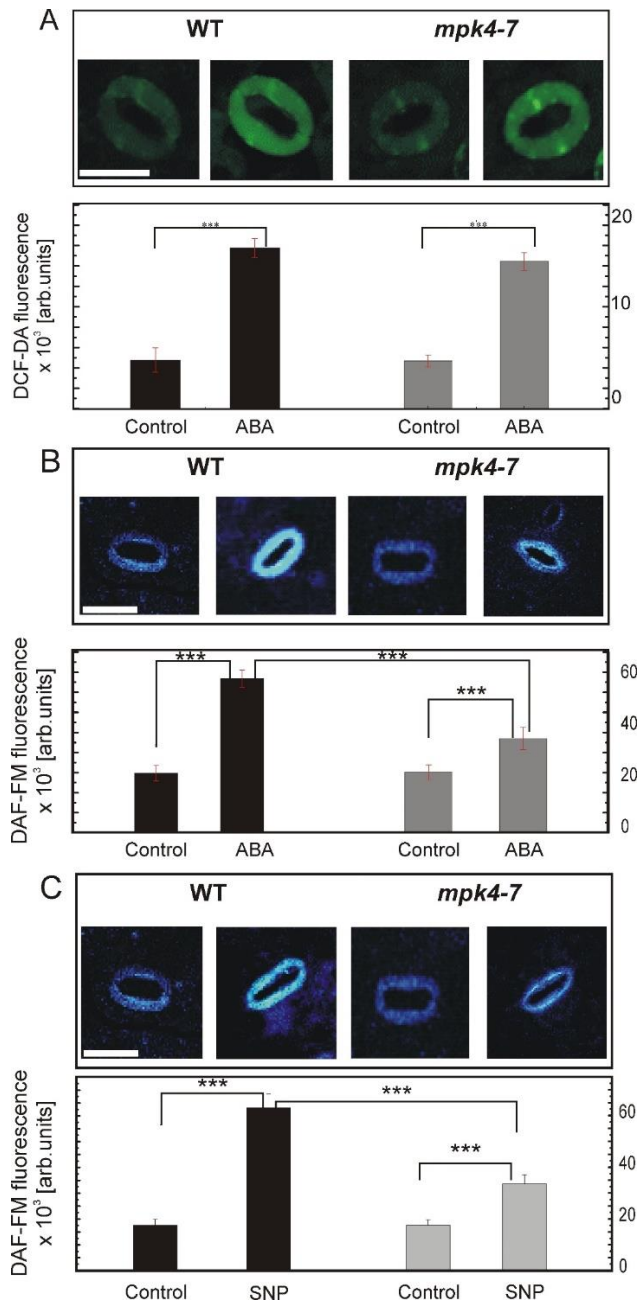

**Supplemental Figure S6. Unaffected ABA-induced H<sub>2</sub>O<sub>2</sub> accumulation in transgenic *mpk4-7* guard cells, and impaired ABA- and SNP-induced NO production in *mpk4-7* guard cells, when compared to wild type (WT) guard cells.** To examine whether MPK4 acts upstream or downstream in H<sub>2</sub>O<sub>2</sub>- and NO-dependent signal transduction pathways and ABA-triggered H<sub>2</sub>O<sub>2</sub> and NO production, fluorescent dye 2',7'-dichlorofluorescein diacetate (DCF-DA) to detect H<sub>2</sub>O<sub>2</sub> level and diaminofluorescein (DAF-FM) to detect NO level in GCs were used. **(A)** H<sub>2</sub>O<sub>2</sub> production in response to ABA treatment examined with DCF-DA analyzed microscopically. Samples treated with ABA-free solution were used as control. **(B and C)** NO production in response to ABA and SNP (NO donor) treatments examined with DAF-FM. Samples treated with ABA- and SNP-free solution were used as a control. Scale bars: 30  $\mu$ m. Presented values are means  $\pm$  SD ( $n = 6$ ). The asterisks indicate significant differences from the WT revealed by the Tukey HSD test (\*\*\*)  $P < 0.001$ .

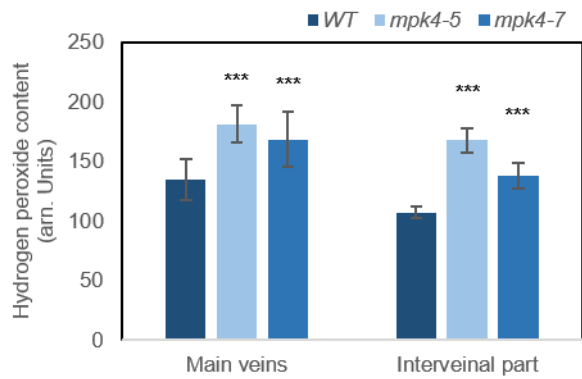

**Supplemental Figure S7. Hydrogen peroxide content in main veins and interveinal part of the leaf.** Content was determined with 3,3'-diaminobenzidine (DAB) staining and ImageJ software (v. 1.52a, 32 bits photo, greyscale from 0 (black) to 256 (white), NIH USA)  $\pm$  SD (n = 18-30). The value of hydrogen peroxide content is calculated as function 256 minus the read value to express proportional relationship. The asterisks indicate significant differences from the WT revealed by the Tukey HSD test (\*\*\*)  $P < 0.001$ .

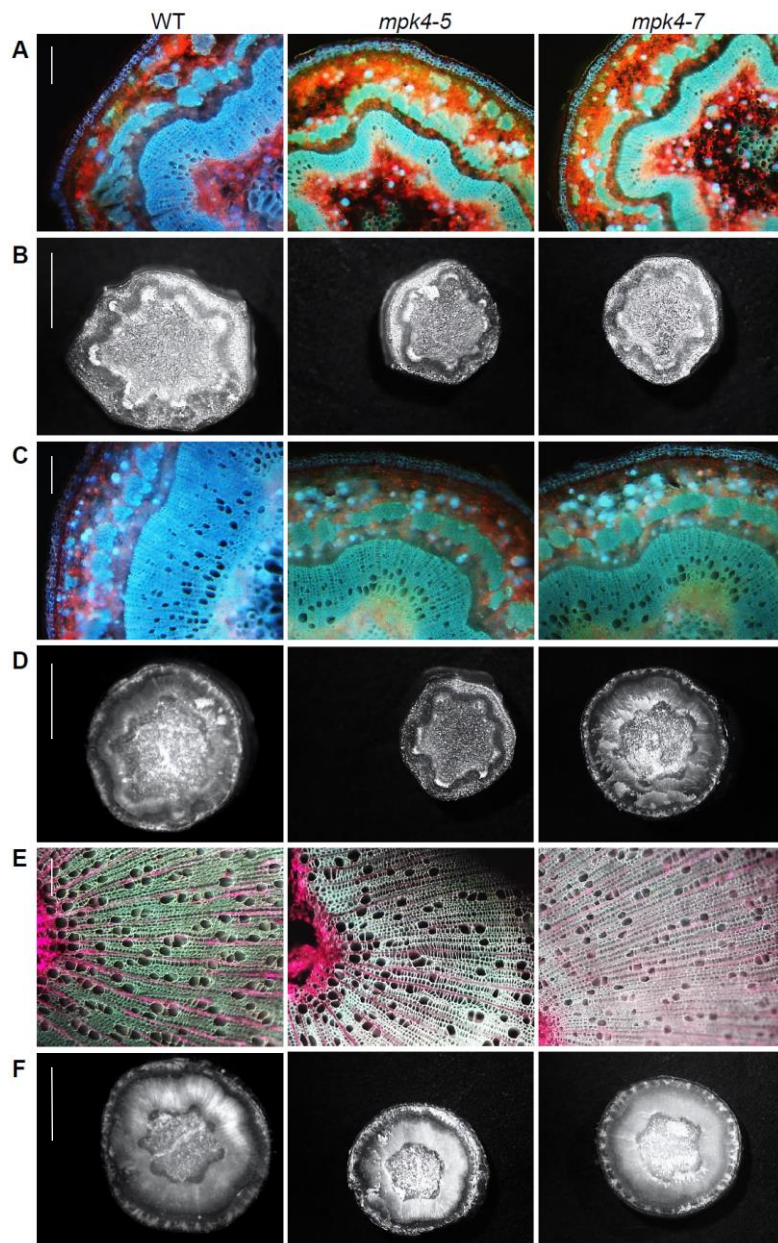

**Supplemental Figure S8. Growth of *mpk4* plants.** Cross-section of stem was performed in wild type (WT), and transgenic *mpk4-5*, *mpk4-7* plants. (**A, C, E**) Cross-sections were made at the distance from the apex of the plant: 1 cm, 10 cm, 30 cm, respectively, and photographed under fluorescent microscopy (UV-2A, EX330-380) at magnitude: 100x, scale bar: 100  $\mu$ m. (**B, D, F**) Cross-sections were made at the distance from the tip of plant: 10 cm (magnitude 15x, scale bar: 0.6 cm), 30 cm (magnitude 15x, scale bar: 0.6 cm), 50 cm (magnitude 10x, scale bar: 1cm), respectively, and photographed under lupa binocular.



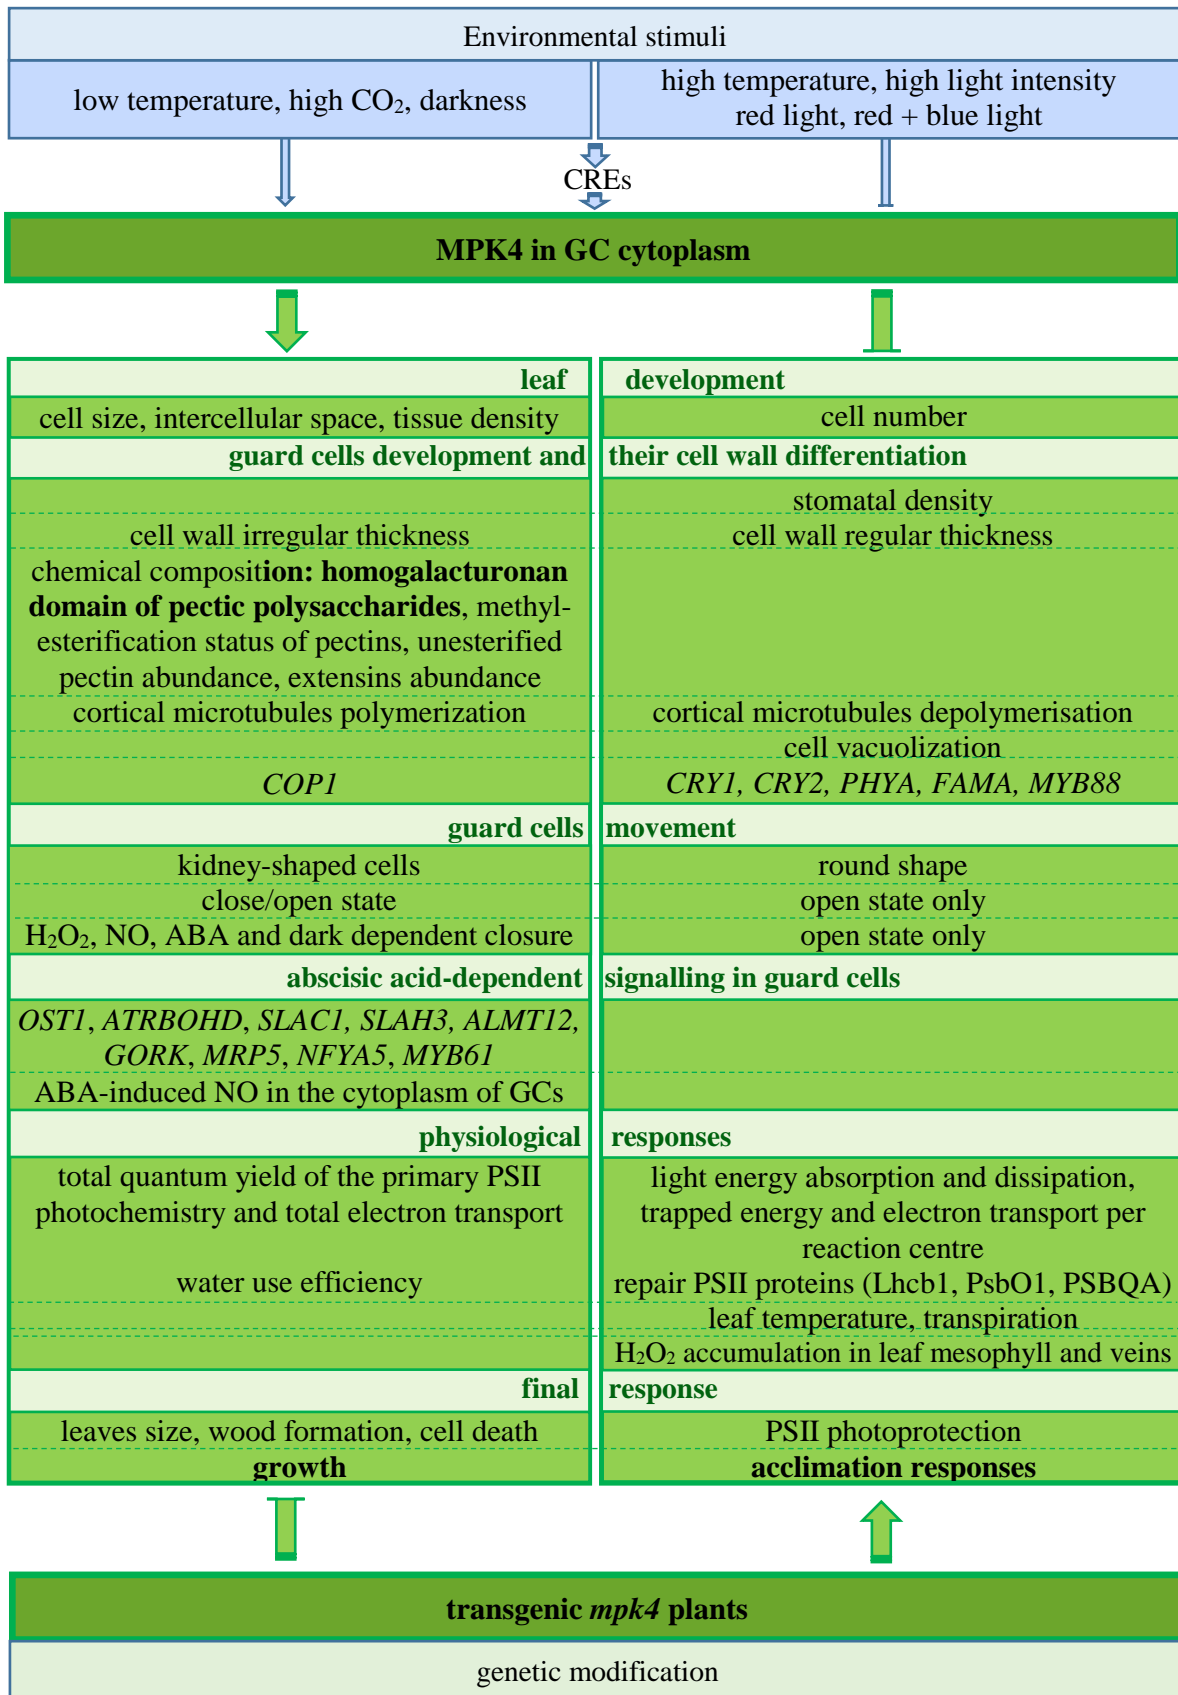

**Supplemental figure S9. List of acclimation and growth responses / mechanisms affected by MPK4.**

**Supplemental Table S1. Cell number, area, and the circularity index in wild type (WT), and transgenic *mpk4-5*, and *mpk4-7* plants.** The parameters were measured with ImageJ v.1.52a and presented relatively to WT, referred as 100. The asterisks indicate significant differences from the WT revealed by the Tukey HSD test (\*)  $P < 0.05$ , (\*\*)  $P < 0.01$ , (\*\*\*)  $P < 0.001$ .

|                            | WT     | Area          |               | Cell number   |               | Circularity index |               |
|----------------------------|--------|---------------|---------------|---------------|---------------|-------------------|---------------|
|                            |        | <i>mpk4-5</i> | <i>mpk4-7</i> | <i>mpk4-5</i> | <i>mpk4-7</i> | <i>mpk4-5</i>     | <i>mpk4-7</i> |
| <b>Adaxial epidermis</b>   | 100.00 | 46.88<br>*    | 79.13         | 150.00<br>*   | 133.33        | 120.17<br>*       | 111.40        |
| <b>Palisade parenchyma</b> | 100.00 | 41.88<br>***  | 69.69<br>*    | 150.00        | 121.43        | 102.36            | 98.99         |
| <b>Spongy parenchyma</b>   | 100.00 | 78.59<br>*    | 55.01         | 140.00        | 160.00        | 126.23            | 112.86        |
| <b>Abaxial epidermis</b>   | 100.00 | 50.74<br>*    | 38.86<br>**   | 144.44        | 133.33        | 116.79            | 118.22        |

**Supplemental Table S2. *In silico* analysis of the cis-regulatory elements (CREs) distribution in the MPK4 promoter of *P. trichocarpa* under different environmental stimuli.** The 1 kb promoter region was analyzed for the presence of motifs responsible for the regulation of gene expression under low temperature, high CO<sub>2</sub>, drought, high temperature, high light. \*ID/IUPAC – Identification code in International Union of Pure and Applied Chemistry.

| Related function                    | ID/IUPAC*                               | Organism described                                                                      | Position | Strand |
|-------------------------------------|-----------------------------------------|-----------------------------------------------------------------------------------------|----------|--------|
| Low temperature responsive element  | MYCCONSENSUSAT                          | <i>A. thaliana</i>                                                                      | 602      | +      |
|                                     |                                         |                                                                                         | 602      | -      |
|                                     |                                         |                                                                                         | 155      | +      |
|                                     |                                         |                                                                                         | 155      | -      |
|                                     | LTREATLTI78                             | <i>A. thaliana</i> ;<br><i>H. vulgare</i>                                               | 146      | +      |
|                                     | CBFHV                                   | <i>H. vulgare</i>                                                                       | 146      | +      |
| LTRECOREATCOR15                     | <i>A. thaliana</i> ;<br><i>B. napus</i> | 145                                                                                     | +        |        |
| CO <sub>2</sub> responsive element  | EECCRCAH1                               | <i>Ch. reinhardtii</i>                                                                  | 677      | -      |
|                                     |                                         |                                                                                         | 191      | -      |
| Drought responsive element          | MYBATRD22                               | <i>A. thaliana</i>                                                                      | 756      | +      |
|                                     | MYB1AT                                  |                                                                                         | 755      | +      |
|                                     | DRE2COREZMRAB17                         | <i>Z. mays</i>                                                                          | 146      | +      |
| High temperature responsive element | HSE                                     | <i>B. oleracea</i>                                                                      | 169      | -      |
|                                     |                                         |                                                                                         | 331      | -      |
|                                     |                                         |                                                                                         | 673      | -      |
|                                     |                                         |                                                                                         | 975      | -      |
| Light responsive element            | Sp1                                     | <i>O. sativa</i>                                                                        | 137      | -      |
|                                     |                                         | <i>Z. mays</i>                                                                          | 111      | +      |
|                                     |                                         | <i>Z. mays</i>                                                                          | 116      | +      |
|                                     | -10PEHVPSBD                             | <i>H. vulgare</i>                                                                       | 981      | -      |
|                                     | MRE                                     | <i>P. crispum</i>                                                                       | 760      | +      |
|                                     | Box-I                                   | <i>P. sativum</i>                                                                       | 865      | +      |
|                                     | GT-1 CONSENSUS                          | <i>O. sativa</i> ;<br><i>N. tabacum</i> ;<br><i>A. thaliana</i> ;<br><i>S. oleracea</i> | 970      | -      |
|                                     |                                         |                                                                                         | 650      | -      |
|                                     |                                         |                                                                                         | 475      | -      |
|                                     |                                         |                                                                                         | 233      | +      |
| 206                                 |                                         |                                                                                         | +        |        |
| 4                                   | +                                       |                                                                                         |          |        |

**Supplemental Table S3. *In silico* analysis of the *cis*-regulatory elements (CREs) distribution in the *MPK4* promoter of *P. trichocarpa* under different hormonal stimuli.** The 1 kb promoter region was analysed for the presence of motifs responsible for the regulation of gene expression under gibberellin, auxin, salicylic acid stimuli. \*ID/IUPAC – Identification code in International Union of Pure and Applied Chemistry.

| Related function                  | ID/IUPAC   | Organism described | Position | Strand |
|-----------------------------------|------------|--------------------|----------|--------|
| Gibberellin responsive element    | GARE-motif | <i>B. oleracea</i> | 415      | +      |
| Auxin responsive element          | TGA        | <i>B. oleracea</i> | 959      | -      |
| Salicylic acid responsive element | TCA        | <i>N. tabacum</i>  | 850      | +      |

**Supplemental Table S4. The promoter sequence upstream of the coding sequence of *MPK4*. (XM\_002302563.2).**

> POPTR\_0002s16400| Chr02:12265644..12270287 reverse

AAGTCTAGAGTTTGTATTAGAATAATTAAATTATCATGATTAAAGATGT  
CGAGGTTATTTATTTTTGTGTTTTAATTTTTTTTTTAAATTAAATTTTATT  
TATTTATTTATTTGCTTAAAATATTTTTTTGTTGTTTTCAAATATTTTAAAT  
ATATCTATGTTAAAAATAAAAATTTTAAAAATAAAAAATATTTTTTTAAA  
AAATTGCTGCTACTATTCAAAAAGGCTTGTCACCGGACCTAACCTAACCC  
ATTCTTTAATTAACAAAAAAACAGTTTTCTTTACTAAACAGACCCAAC  
ATAAAAACAATATAAAAAAGGTCAGCAATTCTCGAGGCACGAGGGCA  
AAGCTTTACCTGTTCAAAGGTTACCCTACACATAAACGGTTCAAAGA  
CGTTCAAATGTTATTTATTTATTTATTAATAATATATTTTTTTAAAATA  
TTTATTTTTAATATTAGTATATAAAAAGCAATCCAAATATATATATATA  
TATATATATAAATAAAATATAAAGCAAGTTTTTTTTATCAAATTTTAAA  
AAAATTGCTGGGAACAAAAATAAATTTTATGACCTGTTTAAAAATAT  
AATAATTTTTTTAATTTTTTTTTAAAATATATTAATAAAATAAATAATTTT  
TTATTTTTTTATACCAACATATCAAATAATAAAAAATAATATAAAAA  
TTAATTTAAAAATAAAAAATTTAAATTTCTTTAAAAATATGGTTGAATC  
CTATAATATACTAGATATATGGTAACAGTGGTAATAAATAAATTAATT  
AATAAAAAGAAAACTCCCACGCGCAAATCAAAGAAATGTCAAAC  
GACAAACTTTACACCTGCCTACCGACACGCCCGCCCCAAATATTAGC  
CCTTCCTCCCCTCCCCTCTGCTTTCTACTTCATCAACAACCTTAGTACTG  
GACGGACTGCTTAATCACCTCTCTCTCTAGCTTGTAATCGGATCCTT  
ACTAGTTGCTGCTACTGAAA

**Supplemental Table S5. List of primers used in RT-qPCR.**

| Gene name      | Accession        | Primer sequence (5'→3')                                  | Reaction efficiency |
|----------------|------------------|----------------------------------------------------------|---------------------|
| <i>UBQ</i>     | POPTR_001G418500 | F: GTTGATTTTTGCTGGGAAGC<br>R: GATCTTGGCCTTCACGTTGT       | 0,856               |
| <i>ACT2</i>    | POPTR_0001s31700 | F:TTCTGGTGATGGTGTGTCTCA<br>R:GACCAGCAAGATCCAAACGAA       | 0,965               |
| <i>COPI</i>    | POPTR_0014s15740 | F:GCCCTTGCTGTAGCCATTAC<br>R:GACATGAGGGTGTCCAGGTC         | 0,898               |
| <i>CRY1</i>    | POPTR_0002s09730 | F:CTCCAATTGCCTTCCCTCAAG<br>R: CCTCATAGCGGCGATTTGTAG      | 0,864               |
| <i>CRY2</i>    | POPTR_0005s17100 | F:GGAAAACCATGAGCCTGTGAG<br>R:AGGAAGATGTCATGCTTGGGA       | 0,870               |
| <i>PHYA</i>    | POPTR_0013s00220 | F:ACATCCTGTTCTTGGCATTGG<br>R:GAAACATCCCCGAATCCCATG       | 0,856               |
| <i>FAMA</i>    | POPTR_0017s08160 | F:TGGCTGATGTTGAAGTGAAGC<br>R:GTGCTGCAATGGTCTTACTCA       | 0,890               |
| <i>MYB88</i>   | POPTR_0010s10310 | F:GGAGACAGATCACACCCACAA<br>R:GGGAAGCCACGTTAACATTGT       | 0,932               |
| <i>MYB61</i>   | POPTR_0005s00340 | F: TTTGCAGAGGTGTGGAAAGA<br>R: CCTGCTGTGAAAATGCTCCT       | 0,892               |
| <i>NFYA5</i>   | POPTR_0006s14740 | F: GGGACCAATTCACAAGGTCA<br>R: GAGAACTGGCCTCATTTTGC       | 0,880               |
| <i>ALMT12</i>  | POPTR_0001s02700 | F: CGTCATGACTGTTGTTGTTGTG<br>R: CCCTGCTAAGAGGGTTCCTAAG   | 0,936               |
| <i>MRP5</i>    | POPTR_0014s18670 | F: ATCAAGCTTTCTCTCCTGCATC<br>R: TGACTGTGAGACATAAGCAGCA   | 0,925               |
| <i>OST1</i>    | POPTR_0004s15270 | F:GGAGACCGGTATGAGTTAGTAAA<br>R: CTGTTTATCCCTCATCAACCTAGC | 0,886               |
| <i>SLAC1</i>   | POPTR_0005s20240 | F: CGTTCGCAAGAAGAACAGC<br>R: TTGCTTCTCAATTGTGCCTTT       | 0,892               |
| <i>SLAH3</i>   | Potri.015G026700 | F: GCTGCCTTTGAGAACCAAAC<br>R: CAAGGTGGCAAGCTGATGTA       | 0,884               |
| <i>RBOH D</i>  | POPTR_0003s15810 | F: GCTTCTACCAGTGGCCTACTTC<br>R: TAATTCTCCGGCAAATTCCTTA   | 0,912               |
| <i>GORK</i>    | POPTR_0017s02430 | F: CTGATCGTGAATCGGTCATTA<br>R: AATTTTGTCCATGCTCGATACC    | 0,911               |
| <i>HSP70</i>   | POPTR_0010s21350 | F: AGCCCTGATCAAATCAATCG<br>R: TCAACAAAACCCCGAACAAT       | 0,889               |
| <i>HSP90</i>   | POPTR_0017s01160 | F: CTGATTTGCTCCGGTACCAT<br>R: TTCCACTGCCTTCTTGCTTT       | 0,931               |
| <i>HSFA1</i>   | POPTR_0001s02140 | F: CCCCATGTTTCTCAAATGCT<br>R:CCATCATTGCATGTCTCTGG        | 0,965               |
| <i>LHCB1.2</i> | POPTR_0005s26080 | F: CCGCATCATCAGCTAAACAA<br>R: AGAGCTTCACTGCCTTTCCA       | 0,919               |
| <i>LHCB2.3</i> | POPTR_0014s16300 | F: CTCTGAGCAAACCCCATCAT<br>R: GATCTGCAGACAAACCAGCA       | 0,908               |
| <i>LHCB5</i>   | POPTR_0019s09140 | F: AAATTTGGAGCCAACGTGTGG<br>R: GGTTGATGGGGATGTTCTTG      | 0,908               |
| <i>PSBO1</i>   | POPTR_0005s13860 | F: AGTGCTGAAGGAGTCCCAA<br>R: GGCTTGAAGGCAAATGACTC        | 0,916               |
| <i>PSBQA</i>   | POPTR_0004s03160 | F: GAATGTGCCTAGCAACACCA<br>R: AAGAACCAGAAGCCAAACCA       | 0,906               |
| <i>MPK4</i>    | POPTR_0002s16400 | F: AAGAAGATTGGTAATGCATTTGA<br>R:TAGCAATAACATTTTCATGATCCA | 0,881               |
